# Supplementary material for: Prescription glucocorticoid medication and iridocyclitis are associated with an increased risk of senile cataract occurrence: a Mendelian randomization study
Source: publisher site journal article supplement (doi:10.18632/aging.205963), 2024-06-26
Supplement: Supplementary file [file aging-v16-205963-supplementary-material-SD1.pdf]

## SUPPLEMENTARY FIGURES

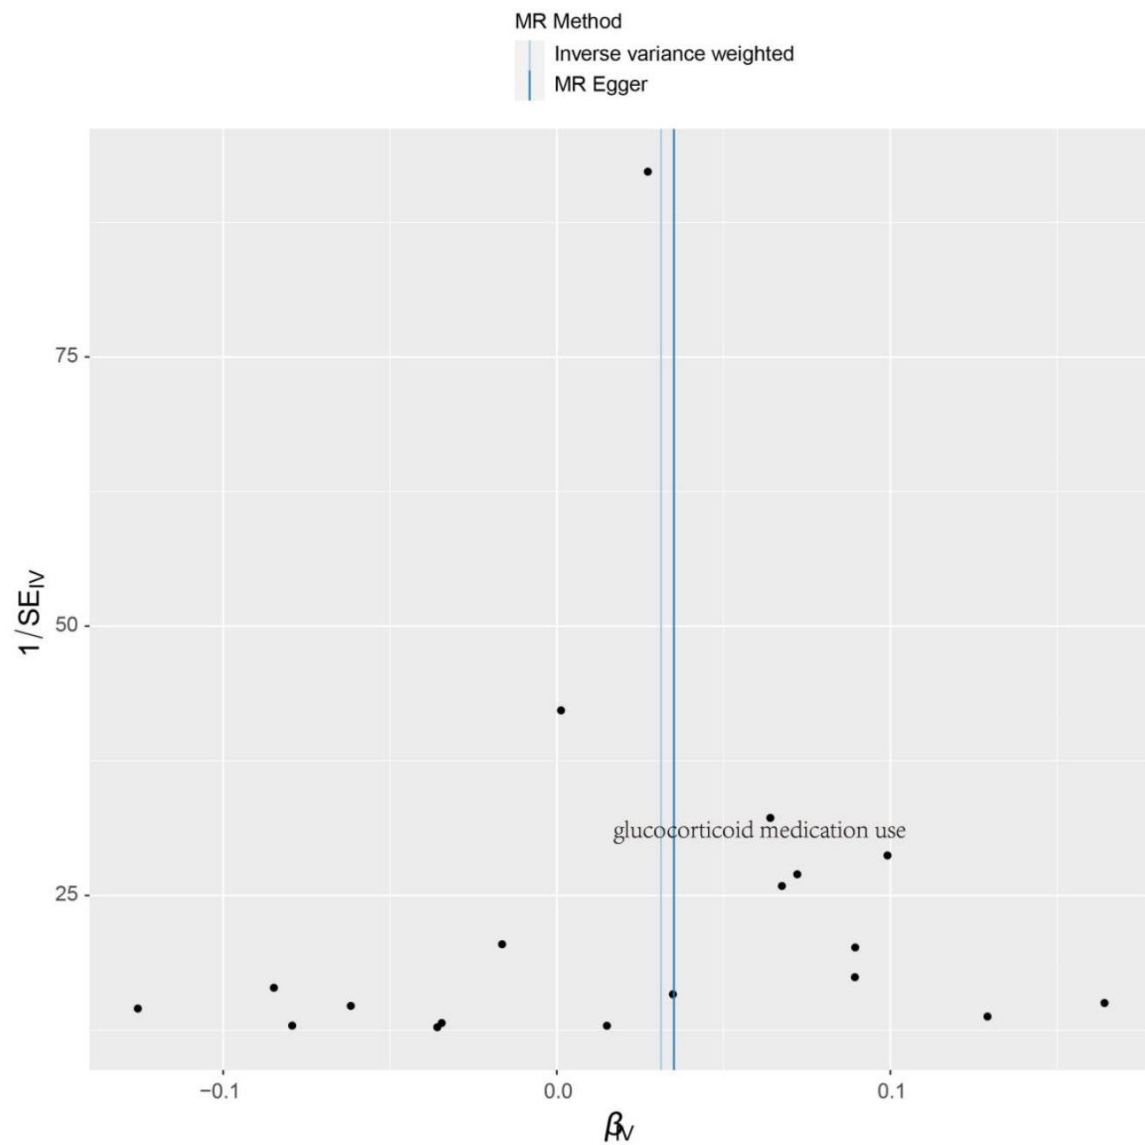

**Supplementary Figure 1. Scatter plot of the effect of iridocyclitis on cataracts.** Each black point represents a SNP, plotted by the estimate of SNP on iridocyclitis and the estimate of SNP on the risk of cataracts. MR, Mendelian randomization; SNP, single nucleotide polymorphism.

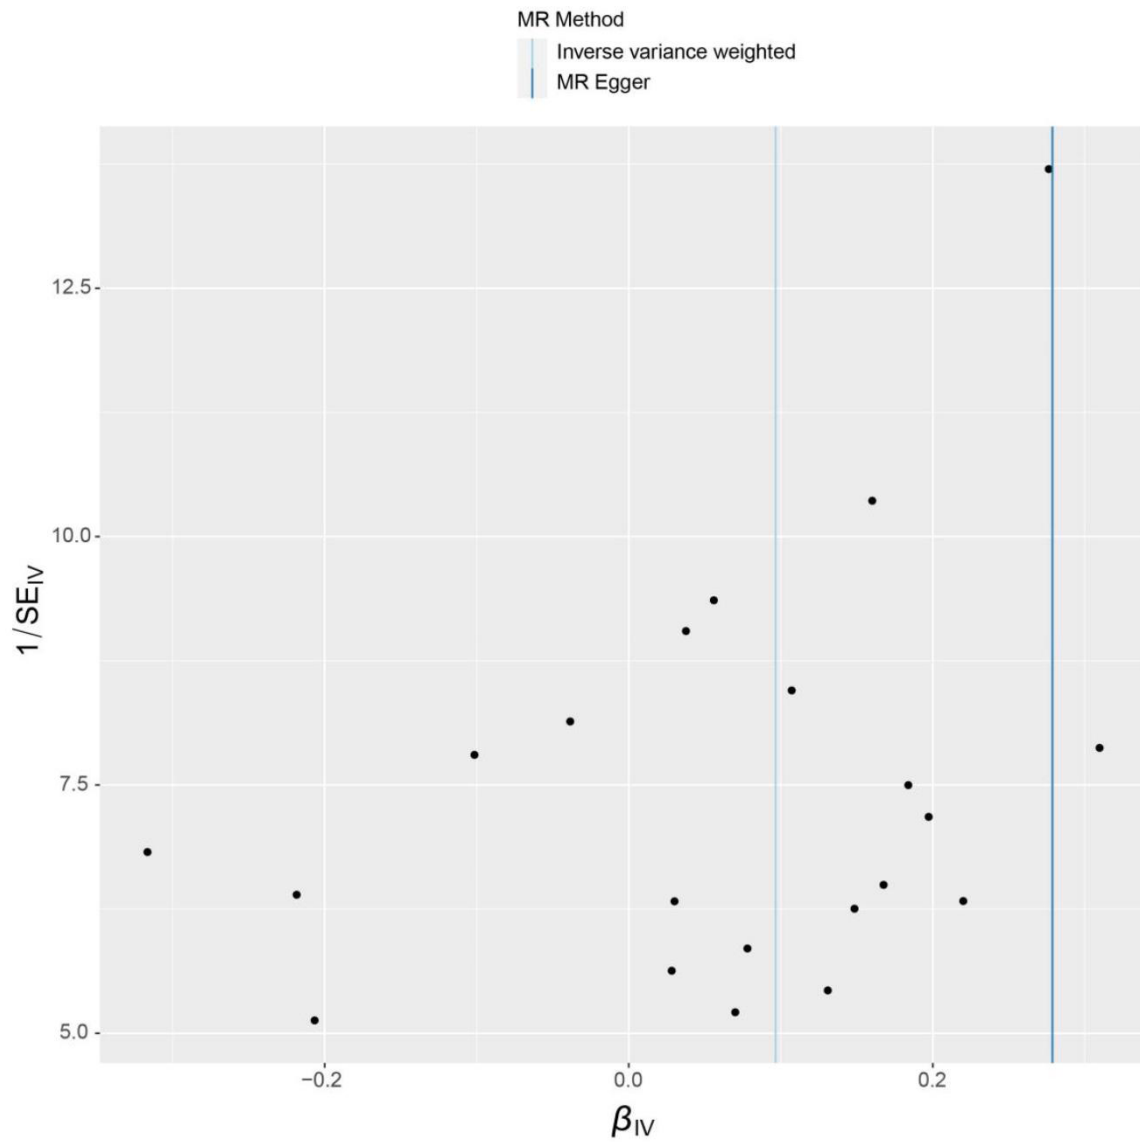

**Supplementary Figure 2. Scatter plot of the effect of iridocyclitis on cataracts.** Each black point represents a SNP, plotted by the estimate of SNP on glucocorticoid medication use and the estimate of SNP on the risk of cataracts. MR, Mendelian randomization; SNP, single-nucleotide polymorphism.

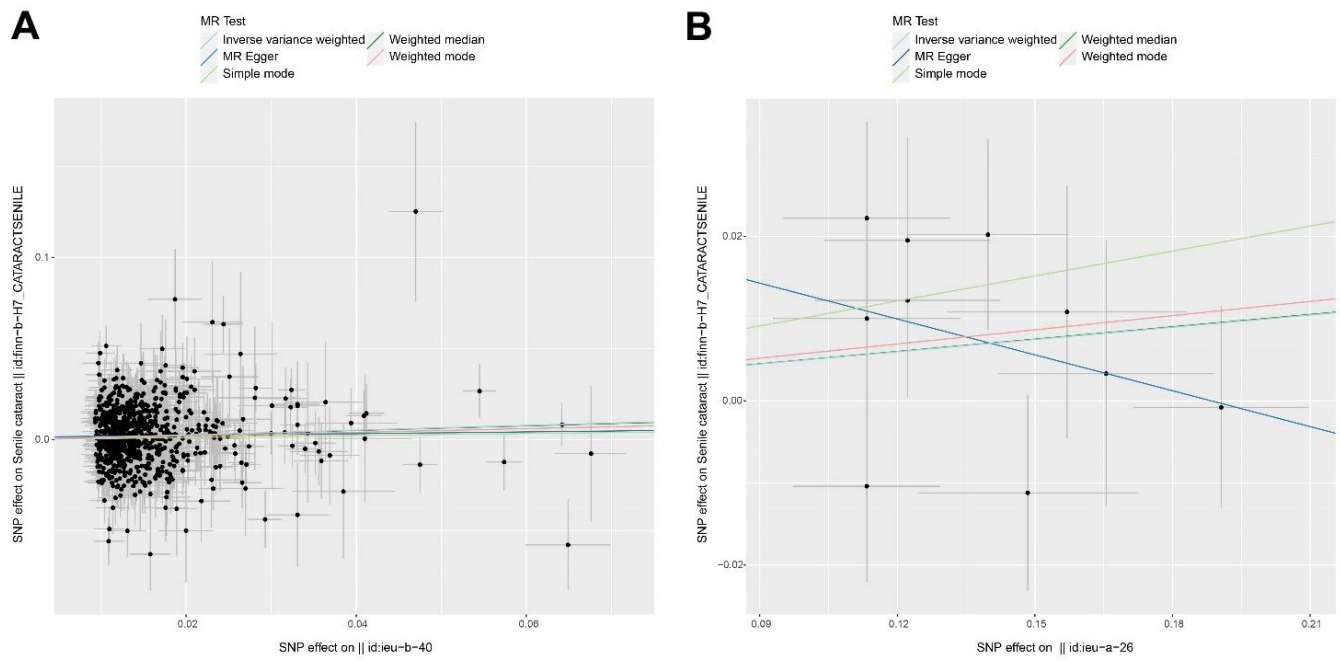

**Supplementary Figure 3. Scatter plots for MR analyses of BMI and T2D on BMDs.** Scatter plots for MR analyses of the causal effect of BMI (A) and T2D (B) on BMDs. The slope of the straight-line fitting of the scatterplot shows the magnitude of the causal relationship.
