# Supplementary material for: Prescription glucocorticoid medication and iridocyclitis are associated with an increased risk of senile cataract occurrence: a Mendelian randomization study
Source: publisher site journal article supplement (doi:10.18632/aging.205963), 2024-06-26
Supplement: Supplementary file [file aging-v16-205963-supplementary-material-SD2.pdf]

## SUPPLEMENTARY TABLES

**Supplementary Table 1. Instrumental variables indicating iridocyclitis.**

| SNP         | Effect allele exposure | Other allele exposure | Beta exposure | Eaf exposure | Chr | Pos      | Se exposure | Pval exposure | Pos exposure | Sample size exposure |
|-------------|------------------------|-----------------------|---------------|--------------|-----|----------|-------------|---------------|--------------|----------------------|
| rs114969413 | A                      | G                     | 0.4953        | 0.0314       | 6   | 31925679 | 0.0731      | 1.21E-11      | 31925679     | 212909               |
| rs12660597  | G                      | A                     | 0.3172        | 0.1678       | 6   | 33847531 | 0.0336      | 3.60E-21      | 33847531     | 212909               |
| rs16891359  | C                      | T                     | 0.2063        | 0.1763       | 6   | 26149000 | 0.0337      | 9.51E-10      | 26149000     | 212909               |
| rs17206617  | G                      | A                     | 1.9456        | 0.08176      | 6   | 31378640 | 0.0521      | 1.00E-200     | 31378640     | 212909               |
| rs181316459 | C                      | G                     | 0.4647        | 0.04744      | 7   | 5473610  | 0.0614      | 3.84E-14      | 5473610      | 212909               |
| rs2549803   | T                      | C                     | -0.1798       | 0.3345       | 5   | 96174929 | 0.0261      | 5.35E-12      | 96174929     | 212909               |
| rs3104418   | A                      | G                     | 0.3316        | 0.373        | 6   | 32581021 | 0.0262      | 8.09E-37      | 32581021     | 212909               |
| rs34119722  | C                      | G                     | 0.3548        | 0.05313      | 6   | 24095141 | 0.0553      | 1.42E-10      | 24095141     | 212909               |
| rs3871467   | A                      | G                     | 0.3053        | 0.4428       | 6   | 29677249 | 0.025       | 3.27E-34      | 29677249     | 212909               |
| rs3993757   | T                      | C                     | 1.0594        | 0.02452      | 6   | 31590746 | 0.0869      | 3.53E-34      | 31590746     | 212909               |
| rs62392759  | A                      | C                     | 0.2194        | 0.1349       | 6   | 25804685 | 0.036       | 1.10E-09      | 25804685     | 212909               |
| rs62443225  | A                      | G                     | 0.282         | 0.07947      | 7   | 5482137  | 0.047       | 1.95E-09      | 5482137      | 212909               |
| rs74853132  | T                      | C                     | 0.5203        | 0.03314      | 6   | 35537065 | 0.0714      | 3.06E-13      | 35537065     | 212909               |
| rs7772289   | T                      | G                     | -0.246        | 0.6169       | 6   | 28674322 | 0.0258      | 1.75E-21      | 28674322     | 212909               |
| rs77831243  | C                      | T                     | 0.5103        | 0.02366      | 6   | 25170013 | 0.0846      | 1.62E-09      | 25170013     | 212909               |
| rs879882    | C                      | T                     | -0.1768       | 0.6175       | 6   | 31139452 | 0.0259      | 8.05E-12      | 31139452     | 212909               |
| rs9277557   | C                      | T                     | 0.2541        | 0.1959       | 6   | 33056694 | 0.0313      | 4.92E-16      | 33056694     | 212909               |
| rs9295932   | G                      | A                     | 0.4282        | 0.2564       | 6   | 30870463 | 0.029       | 3.17E-49      | 30870463     | 212909               |
| rs9468364   | A                      | T                     | 0.9406        | 0.07333      | 6   | 28355711 | 0.0508      | 1.52E-76      | 28355711     | 212909               |

| SNP         | Beta outcome | Eaf outcome | Se outcome | Samplesize outcome | Pval. Outcome | r2          | F           |
|-------------|--------------|-------------|------------|--------------------|---------------|-------------|-------------|
| rs114969413 | 0.0813       | 0.03145     | 0.033      | 216362             | 0.01359       | 0.002894308 | 628.0301746 |
| rs12660597  | -0.0052      | 0.168       | 0.0155     | 216362             | 0.7358        | 0.012110881 | 2652.433538 |
| rs16891359  | 0.0031       | 0.1763      | 0.016      | 216362             | 0.8486        | 0.005113301 | 1111.999876 |
| rs17206617  | 0.0531       | 0.08178     | 0.0211     | 216362             | 0.0119501     | 0.110092521 | 26766.39796 |
| rs181316459 | -0.0394      | 0.04743     | 0.0283     | 216362             | 0.1628        | 0.004293294 | 932.9024143 |
| rs2549803   | 0.0111       | 0.3345      | 0.0122     | 216362             | 0.3652        | 0.008333787 | 1818.251013 |
| rs3104418   | 0.0239       | 0.3728      | 0.0123     | 216362             | 0.0513902     | 0.0274816   | 6113.939759 |
| rs34119722  | 0.0458       | 0.05314     | 0.0258     | 216362             | 0.0764892     | 0.003428619 | 744.3682041 |
| rs3871467   | 0.0206       | 0.443       | 0.0118     | 216362             | 0.0809599     | 0.026831241 | 5965.262618 |
| rs3993757   | 0.105        | 0.02455     | 0.0369     | 216362             | 0.00438904    | 0.007842602 | 1710.238163 |
| rs62392759  | -0.0174      | 0.1349      | 0.017      | 216362             | 0.3043        | 0.004745902 | 1031.719715 |
| rs62443225  | -0.0101      | 0.07943     | 0.0221     | 216362             | 0.6484        | 0.003527678 | 765.9503665 |
| rs74853132  | 0.0181       | 0.03305     | 0.0329     | 216362             | 0.582         | 0.00342564  | 743.7192145 |
| rs7772289   | -0.022       | 0.6169      | 0.0122     | 216362             | 0.0703704     | 0.016025586 | 3523.76617  |
| rs77831243  | -0.0176      | 0.02363     | 0.0388     | 216362             | 0.651         | 0.001983794 | 430.0669144 |
| rs879882    | 0.0222       | 0.6175      | 0.0122     | 216362             | 0.0695697     | 0.008246845 | 1799.124487 |
| rs9277557   | 0.0227       | 0.1959      | 0.0146     | 216362             | 0.1202        | 0.009638052 | 2105.582696 |
| rs9295932   | 0.0274       | 0.2564      | 0.0133     | 216362             | 0.0390796     | 0.033580266 | 7517.878761 |
| rs9468364   | 0.0012       | 0.07321     | 0.0223     | 216362             | 0.9577        | 0.030248125 | 6748.617246 |

beta, MR effect estimate; eaf, effect allele frequency; chr, chromosome; pos, base pair position, se, standard error of effect estimate, pval, p-value of effect estimate; F, F statistics (assessing the extent of weak instrumental variable bias), r2, r2 statistics (assessing the level of IVs interpretation exposure).

**Supplementary Table 2. Instrumental variables indicating glucocorticoid medication use.**

| SNP         | Effect allele exposure | Other allele exposure | Beta exposure | Eaf exposure | Chr | Pos       | Se exposure | Pval exposure | Samplesize exposure |
|-------------|------------------------|-----------------------|---------------|--------------|-----|-----------|-------------|---------------|---------------------|
| rs1011082   | C                      | T                     | 0.07408       | 0.483207     | 17  | 38068514  | 0.011180029 | 3.40E- 11     | 205700              |
| rs10154834  | C                      | T                     | -0.067905188  | 0.494958     | 3   | 33068055  | 0.011217121 | 1.40E-09      | 205700              |
| rs117710327 | A                      | C                     | -0.141427443  | 0.0620109    | 19  | 33726578  | 0.023380492 | 1.50E-09      | 205700              |
| rs12123821  | T                      | C                     | 0.153392807   | 0.0470148    | 1   | 152179152 | 0.026356427 | 5.90E-09      | 205700              |
| rs1391371   | T                      | A                     | 0.204121963   | 0.202145     | 6   | 32603798  | 0.013949579 | 1.70E-48      | 205700              |
| rs1504215   | A                      | G                     | -0.086968465  | 0.350757     | 6   | 91006227  | 0.011709394 | 1.10E- 13     | 205700              |
| rs1689510   | C                      | G                     | 0.080533166   | 0.338025     | 12  | 56396768  | 0.011856495 | 1.10E- 11     | 205700              |
| rs1775553   | T                      | C                     | -0.117927194  | 0.423019     | 10  | 9054325   | 0.011302505 | 1.70E-25      | 205700              |
| rs1898671   | T                      | C                     | 0.097538431   | 0.350684     | 5   | 110408002 | 0.011702287 | 7.80E- 17     | 205700              |
| rs1963497   | A                      | C                     | -0.097599281  | 0.182496     | 15  | 61071791  | 0.014568562 | 2.10E- 11     | 205700              |
| rs2287037   | T                      | C                     | 0.096040754   | 0.395554     | 2   | 102979028 | 0.011432775 | 4.40E- 17     | 205700              |
| rs2517544   | G                      | C                     | 0.093034136   | 0.321999     | 6   | 31009508  | 0.011951148 | 7.00E- 15     | 205700              |
| rs2949661   | T                      | C                     | -0.074315371  | 0.401994     | 1   | 167424924 | 0.011428852 | 7.90E- 11     | 205700              |
| rs340931    | G                      | A                     | -0.06567395   | 0.324864     | 9   | 6086443   | 0.011922614 | 3.60E-08      | 205700              |
| rs34290285  | A                      | G                     | -0.12759555   | 0.255506     | 2   | 242698640 | 0.012807354 | 2.20E-23      | 205700              |
| rs35441874  | A                      | T                     | -0.077133744  | 0.246038     | 16  | 11213021  | 0.013065188 | 3.60E-09      | 205700              |
| rs4739738   | G                      | A                     | 0.078805425   | 0.358014     | 8   | 81291645  | 0.011672134 | 1.50E- 11     | 205700              |
| rs72743461  | A                      | C                     | 0.09897992    | 0.236679     | 15  | 67441750  | 0.013141574 | 5.00E- 14     | 205700              |
| rs7936312   | T                      | G                     | 0.098884502   | 0.477022     | 11  | 76293726  | 0.011205948 | 1.10E- 18     | 205700              |
| rs9270902   | A                      | G                     | -0.114948411  | 0.274952     | 6   | 32571962  | 0.012518021 | 4.20E-20      | 205700              |
| rs992969    | A                      | G                     | 0.139871247   | 0.251777     | 9   | 6209697   | 0.012898849 | 2.10E-27      | 205700              |

| SNP         | Beta outcome | Eaf outcome | Se outcome | Samplesize outcome | Pval outcome | r2          | F           |
|-------------|--------------|-------------|------------|--------------------|--------------|-------------|-------------|
| rs1011082   | 0.0163       | 0.4478      | 0.0117     | 216362             | 0.1618       | 0.01212344  | 3927.086278 |
| rs10154834  | -0.0053      | 0.5154      | 0.0116     | 216362             | 0.6463       | 0.010106486 | 3267.074091 |
| rs117710327 | -0.0279      | 0.09883     | 0.0197     | 216362             | 0.1563       | 0.004866735 | 1564.961749 |
| rs12123821  | -0.0317      | 0.03956     | 0.0299     | 216362             | 0.2896       | 0.003999998 | 1285.131801 |
| rs1391371   | 0.0564       | 0.1937      | 0.0149     | 216362             | 0.000151799  | 0.045771845 | 15349.47253 |
| rs1504215   | 0.019        | 0.2397      | 0.0136     | 216362             | 0.1615       | 0.014508524 | 4711.049168 |
| rs1689510   | 0.0135       | 0.3185      | 0.0124     | 216362             | 0.2777       | 0.01201383  | 3891.149024 |
| rs1775553   | -0.0066      | 0.3025      | 0.0126     | 216362             | 0.6011       | 0.029219637 | 9631.658858 |
| rs1898671   | -0.0099      | 0.3051      | 0.0125     | 216362             | 0.4302       | 0.018214034 | 5936.583506 |
| rs1963497   | 0.0309       | 0.2041      | 0.0143     | 216362             | 0.0309799    | 0.009535253 | 3080.636542 |
| rs2287037   | -0.0037      | 0.4003      | 0.0118     | 216362             | 0.756201     | 0.018923824 | 6172.391122 |
| rs2517544   | 0.0028       | 0.2226      | 0.0147     | 216362             | 0.8486       | 0.015598332 | 5070.526645 |
| rs2949661   | -0.0021      | 0.26        | 0.0132     | 216362             | 0.8709       | 0.011428977 | 3699.531758 |
| rs340931    | -0.0046      | 0.3005      | 0.0126     | 216362             | 0.7177       | 0.007890084 | 2544.890559 |
| rs34290285  | -0.0048      | 0.2165      | 0.0141     | 216362             | 0.7364       | 0.023645599 | 7749.792972 |
| rs35441874  | -0.0101      | 0.2123      | 0.0142     | 216362             | 0.4775       | 0.00826773  | 2667.713091 |
| rs4739738   | 0.0117       | 0.3073      | 0.0126     | 216362             | 0.3517       | 0.012057112 | 3905.338856 |
| rs72743461  | 0.0182       | 0.2624      | 0.0132     | 216362             | 0.167        | 0.013310143 | 4316.674759 |
| rs7936312   | 0.0106       | 0.4156      | 0.0117     | 216362             | 0.3666       | 0.021253521 | 6948.770024 |
| rs9270902   | -0.0356      | 0.3337      | 0.0146     | 216362             | 0.0148399    | 0.020615886 | 6735.908864 |
| rs992969    | 0.0224       | 0.2377      | 0.0135     | 216362             | 0.0987302    | 0.027698422 | 9115.936746 |

beta, MR effect estimate; eaf, effect allele frequency; chr, chromosome; pos, base pair position; se, standard error of effect estimate; pval, p-value of effect estimate; F, F statistics (assessing the extent of weak instrumental variable bias). r2, r2 statistics (assessing the level of IVs interpretation exposure).
